# Supplementary material
Source: PubMed Central journal article supplement (PMC4153835)
Supplement: 13_117_Lu.Suppl.pdf [file 13_117_Lu.Suppl.pdf]

Supplemental Data

**$\alpha 7$  Nicotinic Acetylcholine Receptor Signaling Inhibits Inflammasome Activation by Preventing Mitochondrial DNA Release**

Ben Lu,<sup>1,2</sup> Kevin Kwan,<sup>2</sup> Yaakov A Levine,<sup>2,3</sup> Peder S Olofsson,<sup>2</sup> Huan Yang,<sup>2</sup> Jianhua Li,<sup>2</sup> Sonia Joshi,<sup>2</sup> Haichao Wang,<sup>4</sup> Ulf Andersson,<sup>5</sup> Sangeeta S Chavan,<sup>2</sup> and Kevin J Tracey<sup>2</sup>

Online address: <http://www.molmed.org>

The Feinstein Institute for Medical Research North Shore LIJ  
Empowering Imagination. Pioneering Discovery.®

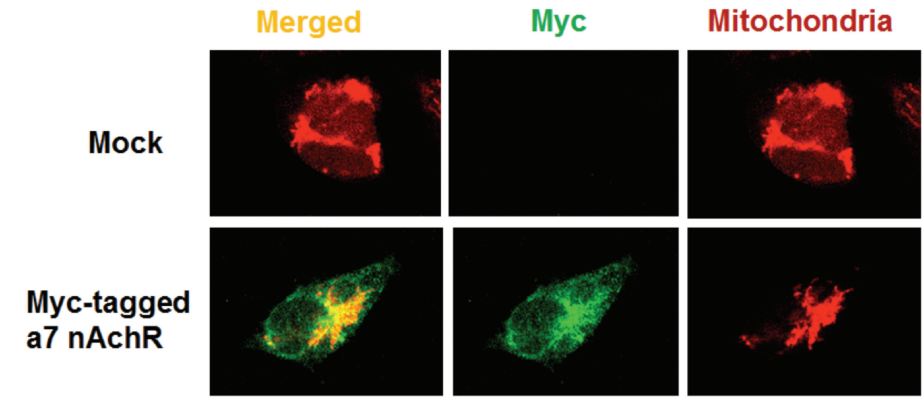

**Supplementary Figure S1.** Alpha 7 nAChR co-localizes with mitochondria. HEK293 cells were transfected with a plasmid encoding myc-tagged alpha 7 nAChR. The genetically modified cells were stained with anti-myc antibodies (green) and a mitochondrial marker (red). The co-localization of myc-tagged alpha 7 nAChR and mitochondria were assessed by using confocal microscopy.

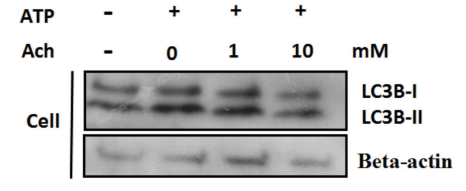

**Supplementary Figure S2.** Cholinergic neural signals did not promote autophagy. LPS-primed peritoneal mouse were stimulated with ATP in the presence or the absence of different concentration of acetylcholine (Ach) for 30 min. Cell lysates were harvested and assessed for LC3B by western blot analysis. Data shown is representative of three independent experiments.
